# Supplementary material for: Evaluating the impact of soy compounds on breast cancer using the data mining approach
Source: Royal Society of Chemistry journal article supplement (doi:10.1039/c9fo00976k), 2020-01-01
Supplement: c9fo00976k1.pdf [file c9fo00976k1.pdf]

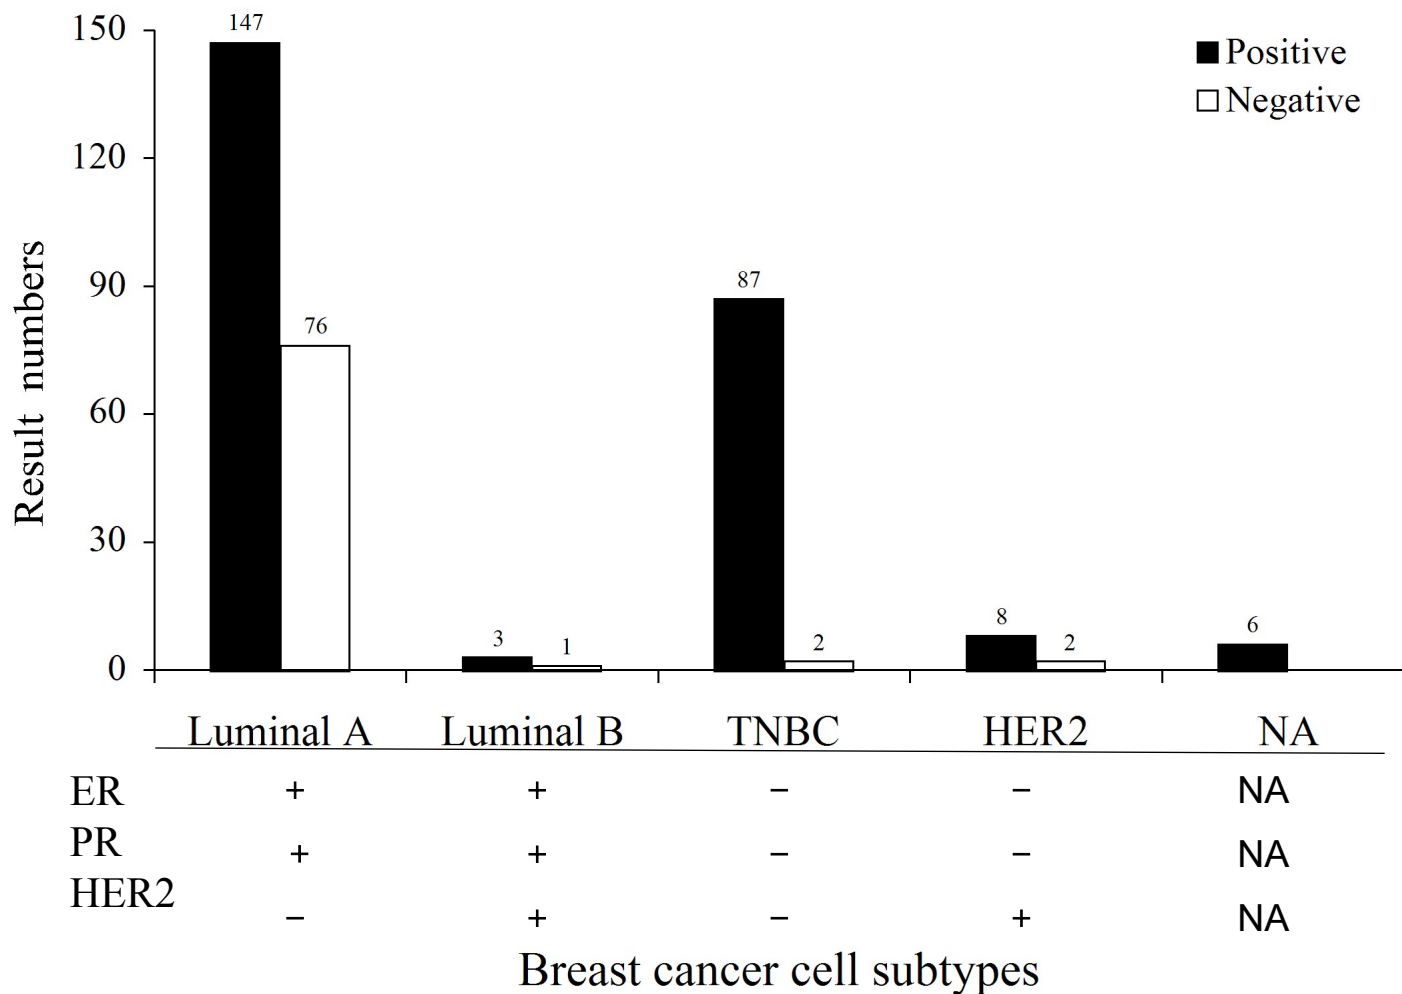

Supplementary 1. The impact of soy intervention on breast cancer with different receptors. Data collected from cell dataset including Luminal A, Luminal B, HER2, TNBC subtypes of breast cancer, and analyzed by the excel pivot table. The label (■) bar means positive effect, and (□) bar means negative effect on breast cancer.
