# Supplementary material for: Evaluating the impact of soy compounds on breast cancer using the data mining approach
Source: Royal Society of Chemistry journal article supplement (doi:10.1039/c9fo00976k), 2020-01-01
Supplement: c9fo00976k2.pdf [file c9fo00976k2.pdf]

**Supplementary 2.** The effect of soy compounds on breast cancer development dependent on the performance of different receptors tested by association rules.<sup>a</sup>

| Rule no. | LHS <sup>c</sup>        | RHS      | Support <sup>b</sup> | Confidence <sup>b</sup> | Lift  |
|----------|-------------------------|----------|----------------------|-------------------------|-------|
| 1        | Phytoestrogen, GEN      | Positive | 32.5%                | 76.2%                   | 0.986 |
| 2        | Phytoestrogen, DAI      | Negative | 5.4%                 | 45.0%                   | 1.978 |
| 3        | Phytoestrogen, DAI      | Positive | 6.6%                 | 55.0%                   | 0.712 |
| 4        | Phytoestrogen, EQ       | Positive | 5.2%                 | 70.3%                   | 0.910 |
| 5        | Phytoestrogen, GLL      | Positive | 2.6%                 | 86.7%                   | 1.122 |
| 6        | Phytoestrogen, MIF      | Positive | 14.6%                | 85.9%                   | 1.112 |
| 7        | Protein/Peptides, BBI   | Positive | 4.4%                 | 100.0%                  | 1.295 |
| 8        | Protein/Peptides, LUN   | Positive | 3.0%                 | 100.0%                  | 1.295 |
| 9        | Protein/Peptides, MSP   | Positive | 4.8%                 | 92.3%                   | 1.195 |
| 10       | ER+, Phytoestrogen      | Positive | 35.1%                | 66.2%                   | 0.857 |
| 11       | ER-, Phytoestrogen      | Positive | 23.0%                | 91.3%                   | 1.182 |
| 12       | PR+, Phytoestrogen      | Positive | 29.5%                | 62.7%                   | 0.812 |
| 13       | PR-, Phytoestrogen      | Positive | 20.4%                | 90.3%                   | 1.169 |
| 14       | HER2+, Phytoestrogen    | Positive | 3.2%                 | 84.2%                   | 1.090 |
| 15       | HER2-, Phytoestrogen    | Positive | 42.9%                | 69.4%                   | 0.898 |
| 16       | ER+, Protein/Peptides   | Positive | 7.2%                 | 94.7%                   | 1.226 |
| 17       | ER-, Protein/Peptides   | Positive | 4.6%                 | 100.0%                  | 1.295 |
| 18       | PR+, Protein/Peptides   | Positive | 6.0%                 | 93.8%                   | 1.214 |
| 19       | PR-, Protein/Peptides   | Positive | 3.6%                 | 100.0%                  | 1.295 |
| 20       | HER2-, Protein/Peptides | Positive | 8.8%                 | 100.0%                  | 1.295 |
| 21       | ER+, PR+, DAI           | Negative | 4.2%                 | 56.8%                   | 2.494 |
| 22       | ER+,HER2-, DAI          | Negative | 4.2%                 | 56.8%                   | 2.494 |
| 23       | PR+, HER2-, DAI         | Negative | 4.2%                 | 56.8%                   | 2.494 |
| 24       | ER+, GEN                | Positive | 18.6%                | 68.4%                   | 0.885 |
| 25       | PR+, GEN                | Positive | 16.6%                | 66.4%                   | 0.860 |
| 26       | ER-, GEN                | Positive | 13.0%                | 95.6%                   | 1.237 |
| 27       | PR-, GEN                | Positive | 11.8%                | 95.2%                   | 1.232 |
| 28       | HER2+, GEN              | Positive | 2.4%                 | 92.3%                   | 1.195 |
| 29       | HER2-, GEN              | Positive | 26.5%                | 75.6%                   | 0.978 |
| 30       | ER+, DAI                | Negative | 4.2%                 | 51.2%                   | 2.251 |
| 31       | PR+, DAI                | Negative | 4.2%                 | 53.8%                   | 2.366 |
| 32       | ER+, DAI                | Positive | 4.0%                 | 48.8%                   | 0.631 |
| 33       | PR+, DAI                | Positive | 3.6%                 | 46.2%                   | 0.597 |

|    |            |          |       |        |       |
|----|------------|----------|-------|--------|-------|
| 34 | HER2-, DAI | Negative | 4.8%  | 50.0%  | 2.197 |
| 35 | HER2-, DAI | Positive | 4.8%  | 50.0%  | 0.647 |
| 36 | ER+, EQ    | Positive | 3.2%  | 64.0%  | 0.829 |
| 37 | PR+, EQ    | Positive | 2.4%  | 57.1%  | 0.740 |
| 38 | HER2-, EQ  | Positive | 3.6%  | 62.1%  | 0.804 |
| 39 | ER+, GLL   | Positive | 2.2%  | 84.6%  | 1.095 |
| 40 | PR+, GLL   | Positive | 2.2%  | 84.6%  | 1.095 |
| 41 | HER2-, GLL | Positive | 2.4%  | 85.7%  | 1.110 |
| 42 | ER+, MIF   | Positive | 6.0%  | 81.1%  | 1.050 |
| 43 | PR+, MIF   | Positive | 3.6%  | 75.0%  | 0.971 |
| 44 | ER-, MIF   | Positive | 4.0%  | 90.9%  | 1.177 |
| 45 | PR-, MIF   | Positive | 2.6%  | 86.7%  | 1.122 |
| 46 | HER2-, MIF | Positive | 3.2%  | 69.6%  | 0.901 |
| 47 | ER+, BBI   | Positive | 3.0%  | 100.0% | 1.295 |
| 48 | PR+, BBI   | Positive | 3.0%  | 100.0% | 1.295 |
| 49 | HER2-, BBI | Positive | 4.0%  | 100.0% | 1.295 |
| 50 | HER2-, LUN | Positive | 3.0%  | 100.0% | 1.295 |
| 51 | ER+, MSP   | Positive | 2.4%  | 85.7%  | 1.110 |
| 52 | ER+, PR+   | Positive | 33.9% | 65.4%  | 0.846 |
| 53 | ER-, PR-   | Positive | 23.4% | 91.4%  | 1.183 |
| 54 | PR+, HER2- | Positive | 31.3% | 64.6%  | 0.836 |
| 55 | ER+, HER2- | Positive | 31.3% | 64.6%  | 0.836 |
| 56 | PR-, HER2- | Positive | 20.4% | 91.9%  | 1.190 |
| 57 | ER-, HER2- | Positive | 20.4% | 91.9%  | 1.190 |

<sup>a</sup> Association rules were identified by using the R package "arules". Samples included all the datasets.

<sup>b</sup> The minimum support value was 0.02 (2 %) and the minimum confidence value was 0.4 (40 %). A total of 57 rules were obtained as the outcome of this assay (as shown in Supplementary 2). The data of life value >1.2 and < 0.8 are shown in this table.

<sup>c</sup> ER: Estrogen receptor, PR: Progesterone receptor, HER2: Human Epidermal Growth Factor Receptor 2, GEN: Genistein, DAI: Daidzein, MIF: Mix isoflavone, MSP: Mix soy protein, GLL: Glyceollins, EQ: Equol, BBI: Bowman-Birk protease inhibitor, LUN: Lunasin.
